# Supplementary material for: Metal-substituted tungstosulfates with Keggin structure: synthesis and characterization
Source: Royal Society of Chemistry journal article supplement (doi:10.1039/c9dt04737a), 2020-01-01
Supplement: c9dt04737a1.pdf [file c9dt04737a1.pdf]

## Supporting information

### Metal-substituted tungstosulfates with Keggin structure: Synthesis and Characterization

Shinya Azuma,<sup>a</sup> Taiga Kadoguchi,<sup>a</sup> Yohei Eguchi,<sup>a</sup> Hikaru Hirabaru,<sup>a</sup> Hiromi Ota,<sup>b</sup> Masahiro Sadakane,<sup>c</sup> Kazumichi Yanagisawa,<sup>d</sup> Takuya Hasegawa,<sup>e</sup> Tadaharu Ueda<sup>a,f,g,\*</sup>

- a) Department of Applied Science, Faculty of Science, Kochi University, Kochi, 780-8520, Japan*
- b) Division of Instrumental Analysis, Department of Instrumental Analysis and Cryogenics, Advanced Science Research Center, Okayama University, Okayama, 700-8530, Japan*
- c) Department of Applied Chemistry, Faculty of Engineering, Hiroshima University, Hiroshima, Japan*
- d) Hydrothermal Reaction Center, Faculty of Science, Kochi University, Japan*
- e) Institute of Multidisciplinary Research for Advanced Materials (IMRAM), Tohoku University, Sendai, Miyagi, 980-8577, Japan*
- f) Department of Marine Resources, Faculty of Agriculture and Marine Science, Kochi University, Nankoku, 783-8502, Japan*
- g) Center for Advanced Marine Core Research, Kochi University, Nankoku, 783-8520, Japan*

## Experimental

### *Preparation of (n-Bu<sub>4</sub>N)<sub>4</sub>H<sub>2</sub>[SW<sub>11</sub>O<sub>39</sub>] (SW<sub>11</sub>)*

(n-Bu<sub>4</sub>N)<sub>2</sub>[SW<sub>12</sub>O<sub>40</sub>] (1.35 g) prepared by using the reported method,<sup>S1</sup> was dissolved in 90 mL of acetone, and 0.9 mL of 1 M KHCO<sub>3</sub> was added. The formed white precipitation were separated by filtration, and then 40 mL of water containing 1.5 g of n-Bu<sub>4</sub>NBr was added to the filtrate to generate a pale-yellow precipitate. If the precipitate was oily, it was washed with Et<sub>2</sub>O under sonication to obtain a powdery precipitate. The precipitate was washed with water and ethanol and dried in air. The final crystalline product was obtained by recrystallization from dry acetone (Yield: 1.1 g). Anal. Calcd for (n-Bu<sub>4</sub>N)<sub>4</sub>H<sub>2</sub>[SW<sub>11</sub>O<sub>39</sub>]: C 21.06, H 4.03, N 1.53, S 0.88%. Found; C 20.55, H 3.80, N 1.52, S 0.94%.

### *Preparation of the tetra-butylammonium salt of metal-substituted tungstosulfates, [SMW<sub>11</sub>O<sub>39</sub>]<sup>n-</sup> (M=Mn, Co, Ni, Cu)(SMW<sub>11</sub>)*

(n-Bu<sub>4</sub>N)<sub>4</sub>H<sub>2</sub>[SW<sub>11</sub>O<sub>39</sub>] (0.948 g) was dissolved in 120 mL of acetone, and then 3.0 mL of 0.2 M metal-nitrate stock solution was added. After stirring the solution for 10 min, 70 mL of water containing 1.0 g of n-Bu<sub>4</sub>NBr was added to afford a precipitate. It was collected by filtration and washed with a plenty of water and ethanol. Fine crystals were obtained by recrystallization from acetone. Yields: 0.92 g (M=Mn); 0.95 g (M=Co); 0.89 g (M=Ni); and 0.93 g (M=Cu). Calcd for (n-Bu<sub>4</sub>N)<sub>4</sub>[SMnW<sub>11</sub>O<sub>39</sub>]; C 20.74, H 3.97, N 1.51, S 0.86%. Found; C, 20.22, H 3.83, N 1.52, S 0.89%. Calcd for (n-Bu<sub>4</sub>N)<sub>4</sub>[SCoW<sub>11</sub>O<sub>39</sub>]; C 20.72, H 3.96, N 1.51, S 0.86%. Found; C 20.41, H 3.83, N 1.50, S 0.52%. Calcd for (n-Bu<sub>4</sub>N)<sub>4</sub>[SNiW<sub>11</sub>O<sub>39</sub>]; C 20.72, H 3.96, N 1.50, S 0.86%. Found; C, 20.61, H 3.85, N 1.48, S 0.87%. Calcd for (n-Bu<sub>4</sub>N)<sub>4</sub>[SCuW<sub>11</sub>O<sub>39</sub>]; C 20.69, H 3.96, N 1.50, S 0.86%. Found; C 20.90, H 3.68, N 1.47, S 0.87%.

## Apparatus and reagents

X-ray single-crystal crystallographic data were collected with a Rigaku Saturn 724 diffractometer using multilayer mirror monochromated Mo-K $\alpha$  radiation. The linear absorption coefficients,  $\mu$  values, for Mo-K $\alpha$  radiation are 116.904 cm<sup>-1</sup> for SW<sub>11</sub>, 112.191 cm<sup>-1</sup> for SMnW<sub>11</sub>, 112.728 cm<sup>-1</sup> for SCoW<sub>11</sub>, 114.980 cm<sup>-1</sup> for SNiW<sub>11</sub> and 114.076 cm<sup>-1</sup> for SCuW<sub>11</sub>. An empirical absorption correction was applied, which resulted in transmission factors ranging from 0.203 to 0.311 for SW<sub>11</sub>, from 0.202 to 0.291 for SMnW<sub>11</sub>, from 0.363 to 0.508 for SCoW<sub>11</sub>, from 0.265 to 0.317 for SCoW<sub>11</sub> and from 0.261 to 0.320 for SCuW<sub>11</sub>. The data were corrected for Lorentz and polarization effects. The structure was solved by direct methods<sup>S2</sup> and expanded using Fourier techniques. The cations and solvent molecules were omitted by the SQUEEZE procedure<sup>S3</sup> because it was not important to elucidate the interaction between the POMs and the tetra-alkyl ammonium cations.<sup>17</sup> The final cycle of full-matrix least-squares refinement<sup>S4</sup> on F<sup>2</sup> was based on 649 observed reflections for SW<sub>11</sub>, 668 observed reflections for SMnW<sub>11</sub>, 669 observed reflections for SCoW<sub>11</sub>, 668 observed reflections for SNiW<sub>11</sub>, and 675 observed reflections for SCuW<sub>11</sub>, and 19 variable parameters and converged (largest parameter shift was 0.00 times its esd) with unweighted and weighted agreement factors of:

$R_1 = \sum ||F_o| - |F_c|| / \sum |F_o| = 0.0934$  for SW<sub>11</sub>, 0.0726 for SMnW<sub>11</sub>, 0.0417 for SCoW<sub>11</sub>, 0.0489 for SNiW<sub>11</sub>, and 0.0362 for SCuW<sub>11</sub>

$wR_2 = [\sum (w(F_o^2 - F_c^2)^2) / \sum w(F_o^2)^2]^{1/2} = 0.2189$  for SW<sub>11</sub>, 0.1755 for SMnW<sub>11</sub>, 0.1056 for SCoW<sub>11</sub>, 0.1151 for SNiW<sub>11</sub>, and 0.0866 for SCuW<sub>11</sub>

The goodness of fits<sup>S5</sup> were 1.28 for SW<sub>11</sub>, 1.21 for SMnW<sub>11</sub>, 1.08 for SCoW<sub>11</sub>, 1.13 for SNiW<sub>11</sub>, and 1.03 for SCuW<sub>11</sub>. Unit weights were used. The maximum and minimum peaks on the final difference Fourier map corresponded to 1.64 and -0.90 e/ $\text{\AA}^3$  for SW<sub>11</sub>, 1.06 and -0.76 e/ $\text{\AA}^3$  for SMnW<sub>11</sub>, 1.69 and -1.23 e/ $\text{\AA}^3$  for SCoW<sub>11</sub>, 1.85 and -1.18 e/ $\text{\AA}^3$  for SNiW<sub>11</sub> and 0.96 and -0.75 e/ $\text{\AA}^3$  for SCuW<sub>11</sub>.

Neutral atom scattering factors were taken from the International Tables for Crystallography (IT), Vol. C, Table 6.1.1.4 5.<sup>S6</sup> Anomalous dispersion effects were included in F<sub>calc</sub>;<sup>S7</sup> the values for D<sub>f</sub>' and D<sub>f</sub>' were those of Creagh and McAuley.<sup>S8</sup> The values for the mass attenuation coefficients are those of Creagh and Hubbell.<sup>S9</sup> All calculations were performed using the Rigaku Corporation

CrystalStructure9 crystallographic software package except for refinement, which was performed using SHELXL Version 2016/6SHELXL97.<sup>S10</sup>

Elemental analyses was carried out with PERKIN ELMER Series II CHNS/O Analyzer 2400. ESI-MS spectra were obtained in CH<sub>3</sub>CN in anion mode with a Thermo Fisher Scientific LTQ Orbitrap XL instrument, and ionization was achieved by applying 5 kV. Spectrophotometric measurements were carried out by using a Jasco FT/IR-4100 IR spectrometer, a Horiba-Jobin Yvon HR-800 instrument with a 514.5 nm Ar laser for excitation for Raman, and a Jasco V-670 for UV-Vis spectrophotometry.

Voltammetric measurements were carried out with a BAS 50 W (Bioanalytical Systems, BAS) electrochemical workstation. A standard three-electrode arrangement was employed: a glassy carbon disk electrode with a surface area of 0.071 cm<sup>2</sup> was used as working electrode, platinum wire was used as the counter electrode, and Ag/Ag<sup>+</sup> (0.01 M AgNO<sub>3</sub> in CH<sub>3</sub>CN) was used as the reference electrode. The silver wire was put in 0.01 M AgNO<sub>3</sub> containing CH<sub>3</sub>CN in a double-jacketed system separated by sintered glass. Unless otherwise stated, the scan rate for voltammetric experiments was 100 mV s<sup>-1</sup>. The measured potential versus Ag/Ag<sup>+</sup> was converted to the Fc/Fc<sup>+</sup> (Fc = ferrocene) scale using data derived from voltammograms of the oxidation of ferrocene. Prior to each measurement, the glassy carbon electrode (GCE) was polished with an aqueous 0.1-μm diamond slurry and washed with distilled water. The sample solution was always purged with nitrogen or argon gas to remove dissolved oxygen. All electrochemical measurements were made at 25.0±0.2°C.

Tetrabutylammonium hexafluorophosphate, [n-Bu<sub>4</sub>N][PF<sub>6</sub>], recrystallized at least twice from ethanol, was used as the electrolyte in the electrochemical experiments. Acetonitrile (CH<sub>3</sub>CN) of LC-MS grade were purchased from WAKO and used as received from the manufacturer for ESI-MS and electrochemical measurements. Other reagents were of analytical grade and were used as received.

## References and notes

- (S1) Himeno, S.; Takamoto, M.; Hoshiba, M.; Higuchi, A.; Hashimoto, M., Preparation and characterization of an  $\alpha$ -Keggin-type [SW<sub>12</sub>O<sub>40</sub>]<sup>2-</sup> complex. *Bull. Chem. Soc. Jpn.* **2004**, 77, 519-524.
- (S2) Burla, M. C., Caliendo, R., Camalli, M., Carrozzini, B., Cascarano, G. L., De Caro, L., Giacovazzo, C., Polidori, G. Siliqi, D. and Spagna R. *J. Appl. Cryst.* 2007, 40, 609-613.
- (S3) Spek, A. L., *Acta Cryst.*, **2009**, D65, 148-155.
- (S4) Least Squares function minimized (SHELXL97):  $\sum w(F_o^2 - F_c^2)^2$  where w = Least Squares weights.
- (S5) Goodness of fit is defined as:  $[\sum w(F_o^2 - F_c^2)^2 / (N_o - N_v)]^{1/2}$  where: N<sub>o</sub>= number of observations; N<sub>v</sub>= number of variables
- (S6) International Tables for Crystallography, Vol. C. Ed. A.J.C. Wilson, Kluwer Academic Publishers, Dordrecht, Netherlands, Table 6.1.1.4, 1992, pp. 572.
- (S7) Ibers, J. A. & Hamilton, W. C.; *Acta Cryst.*, 1964, 17, 781.
- (S8) Creagh, D. C. & McAuley, W.J.; "International Tables for Crystallography", Vol C, (A.J.C. Wilson, ed.), Kluwer Academic Publishers, Boston, Table 4.2.6.8, 1992, p. 219-222.
- (S9) Creagh, D. C. & Hubbell, J.H.; "International Tables for Crystallography", Vol C, (A.J.C. Wilson, ed.), Kluwer Academic Publishers, Boston, Table 4.2.4.3, 1992, p. 200-206.
- (S10) Sheldrick, G. M. *Acta Cryst.* 2008, A64, 112-122.

**Table S1** Crystallographic data for [SW<sub>11</sub>O<sub>39</sub>]<sup>6-</sup>, [SMnW<sub>11</sub>O<sub>39</sub>]<sup>4-</sup>, [SCoW<sub>11</sub>O<sub>39</sub>]<sup>4-</sup>, [SNiW<sub>11</sub>O<sub>39</sub>]<sup>4-</sup> and [SCuW<sub>11</sub>O<sub>39</sub>]<sup>4-</sup>.

| Formula                                  | SW <sub>11</sub> O <sub>39</sub>                  | SMnW <sub>11</sub> O <sub>39</sub>                | SCoW <sub>11</sub> O <sub>39</sub>                | SNiW <sub>11</sub> O <sub>39</sub>                | SCuW <sub>11</sub> O <sub>39</sub>                |
|------------------------------------------|---------------------------------------------------|---------------------------------------------------|---------------------------------------------------|---------------------------------------------------|---------------------------------------------------|
| FW(g mol <sup>-1</sup> )                 | 2678.39                                           | 2733.32                                           | 2737.32                                           | 2737.09                                           | 2741.93                                           |
| Crystal system                           | cubic                                             | cubic                                             | cubic                                             | cubic                                             | cubic                                             |
| Space group                              | <i>Im</i> $\bar{3}$ <i>m</i> (229)                |
| a(Å)                                     | 17.565                                            | 17.864                                            | 17.854                                            | 17.747                                            | 17.805                                            |
| V(Å <sup>3</sup> )                       | 5419(5)                                           | 5701(9)                                           | 5691(8)                                           | 5590(8)                                           | 5645(8)                                           |
| Z                                        | 2                                                 | 2                                                 | 2                                                 | 2                                                 | 2                                                 |
| d <sub>calcd</sub> g/cm <sup>3</sup>     | 1.641                                             | 1.592                                             | 1.597                                             | 1.626                                             | 1.574                                             |
| No. observations (all data)              | 42711                                             | 43310                                             | 43956                                             | 43725                                             | 43579                                             |
| GOF                                      | 1.282                                             | 1.211                                             | 1.084                                             | 1.134                                             | 1.030                                             |
| final R indices(I>2.00σ(I)) <sup>a</sup> | R <sub>1</sub> =0.0934<br>wR <sub>2</sub> =0.2188 | R <sub>1</sub> =0.0726<br>wR <sub>2</sub> =0.1739 | R <sub>1</sub> =0.0417<br>wR <sub>2</sub> =0.1054 | R <sub>1</sub> =0.0489<br>wR <sub>2</sub> =0.1147 | R <sub>1</sub> =0.0362<br>wR <sub>2</sub> =0.0859 |
| final R indices(all data) <sup>b</sup>   | R <sub>1</sub> =0.0931<br>wR <sub>2</sub> =0.2189 | R <sub>1</sub> =0.0753<br>wR <sub>2</sub> =0.1755 | R <sub>1</sub> =0.0419<br>wR <sub>2</sub> =0.1056 | R <sub>1</sub> =0.0495<br>wR <sub>2</sub> =0.1151 | R <sub>1</sub> =0.0373<br>wR <sub>2</sub> =0.0866 |

<sup>a</sup>R<sub>1</sub>= $\sum ||F_o| - |F_c|| / \sum |F_o|$  (I > 2.00 σ (I)). <sup>b</sup>wR<sub>2</sub> = [ $\sum (w(F_o^2 - F_c^2)^2) / \sum w(F_o^2)^2$ ]<sup>1/2</sup>.

**Table S2** Observed and calculated ionic molecular weights per anion charge (m/z) of POMs in ESI-MS spectra.

| POMs                                                                | Calculated<br>m/z | Observed<br>m/z |
|---------------------------------------------------------------------|-------------------|-----------------|
| H[SW <sub>11</sub> O <sub>38</sub> ] <sup>3-</sup>                  | 887.4182          | 887.4181        |
| H[SMn <sup>II</sup> W <sub>11</sub> O <sub>39</sub> ] <sup>3-</sup> | 911.0606          | 911.0604        |
| H[SCo <sup>II</sup> W <sub>11</sub> O <sub>39</sub> ] <sup>3-</sup> | 912.3923          | 912.3921        |
| H[SNi <sup>II</sup> W <sub>11</sub> O <sub>39</sub> ] <sup>3-</sup> | 912.7265          | 912.7259        |
| [SCu <sup>III</sup> W <sub>11</sub> O <sub>39</sub> ] <sup>3-</sup> | 914.0556          | 914.0547        |

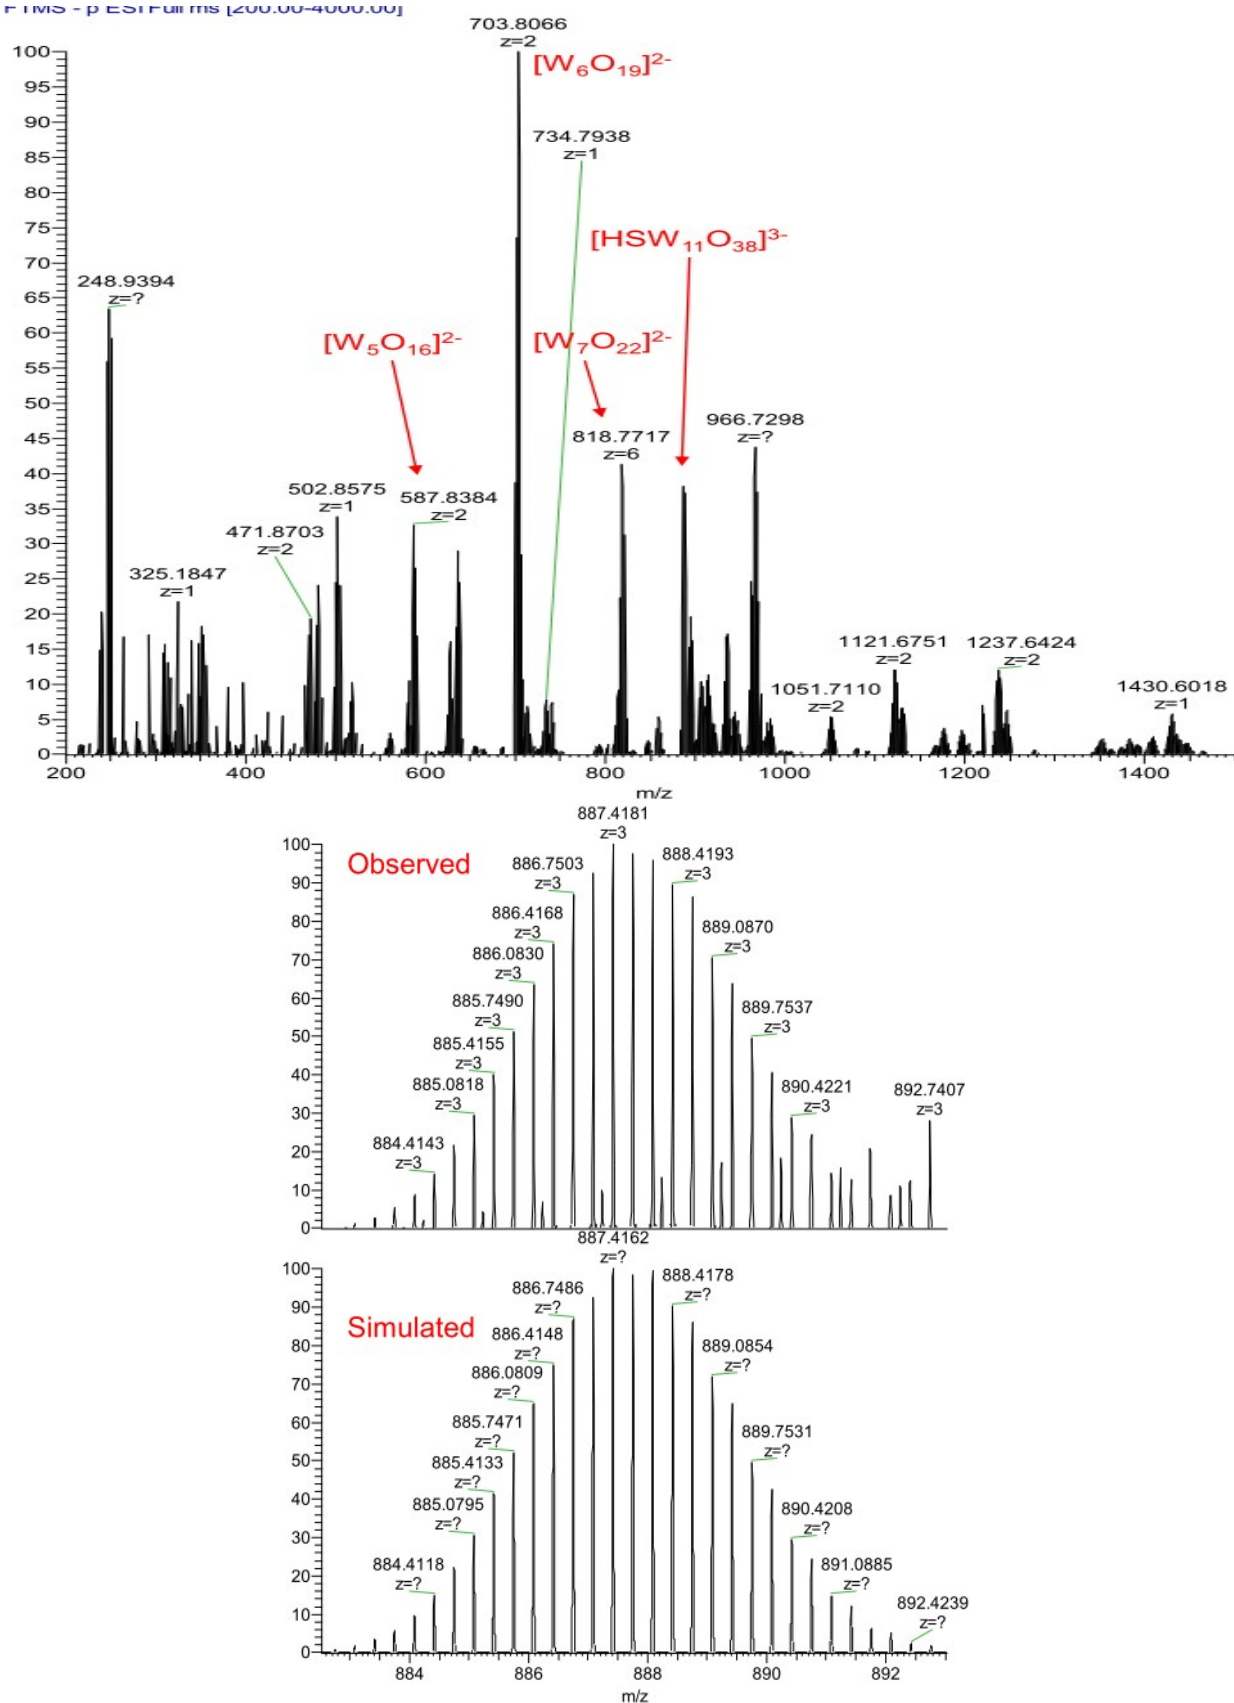

**Figure S1** ESI-MS spectra of  $(Bu_4N)_4H_2[SW_{11}O_{39}]$  dissolved in  $CH_3CN$ . (top) Spectrum between  $m/z$  of 200 and 1500 and (bottom) expansion of the profile assignable to  $[HSW_{11}O_{38}]^{3-}$ .

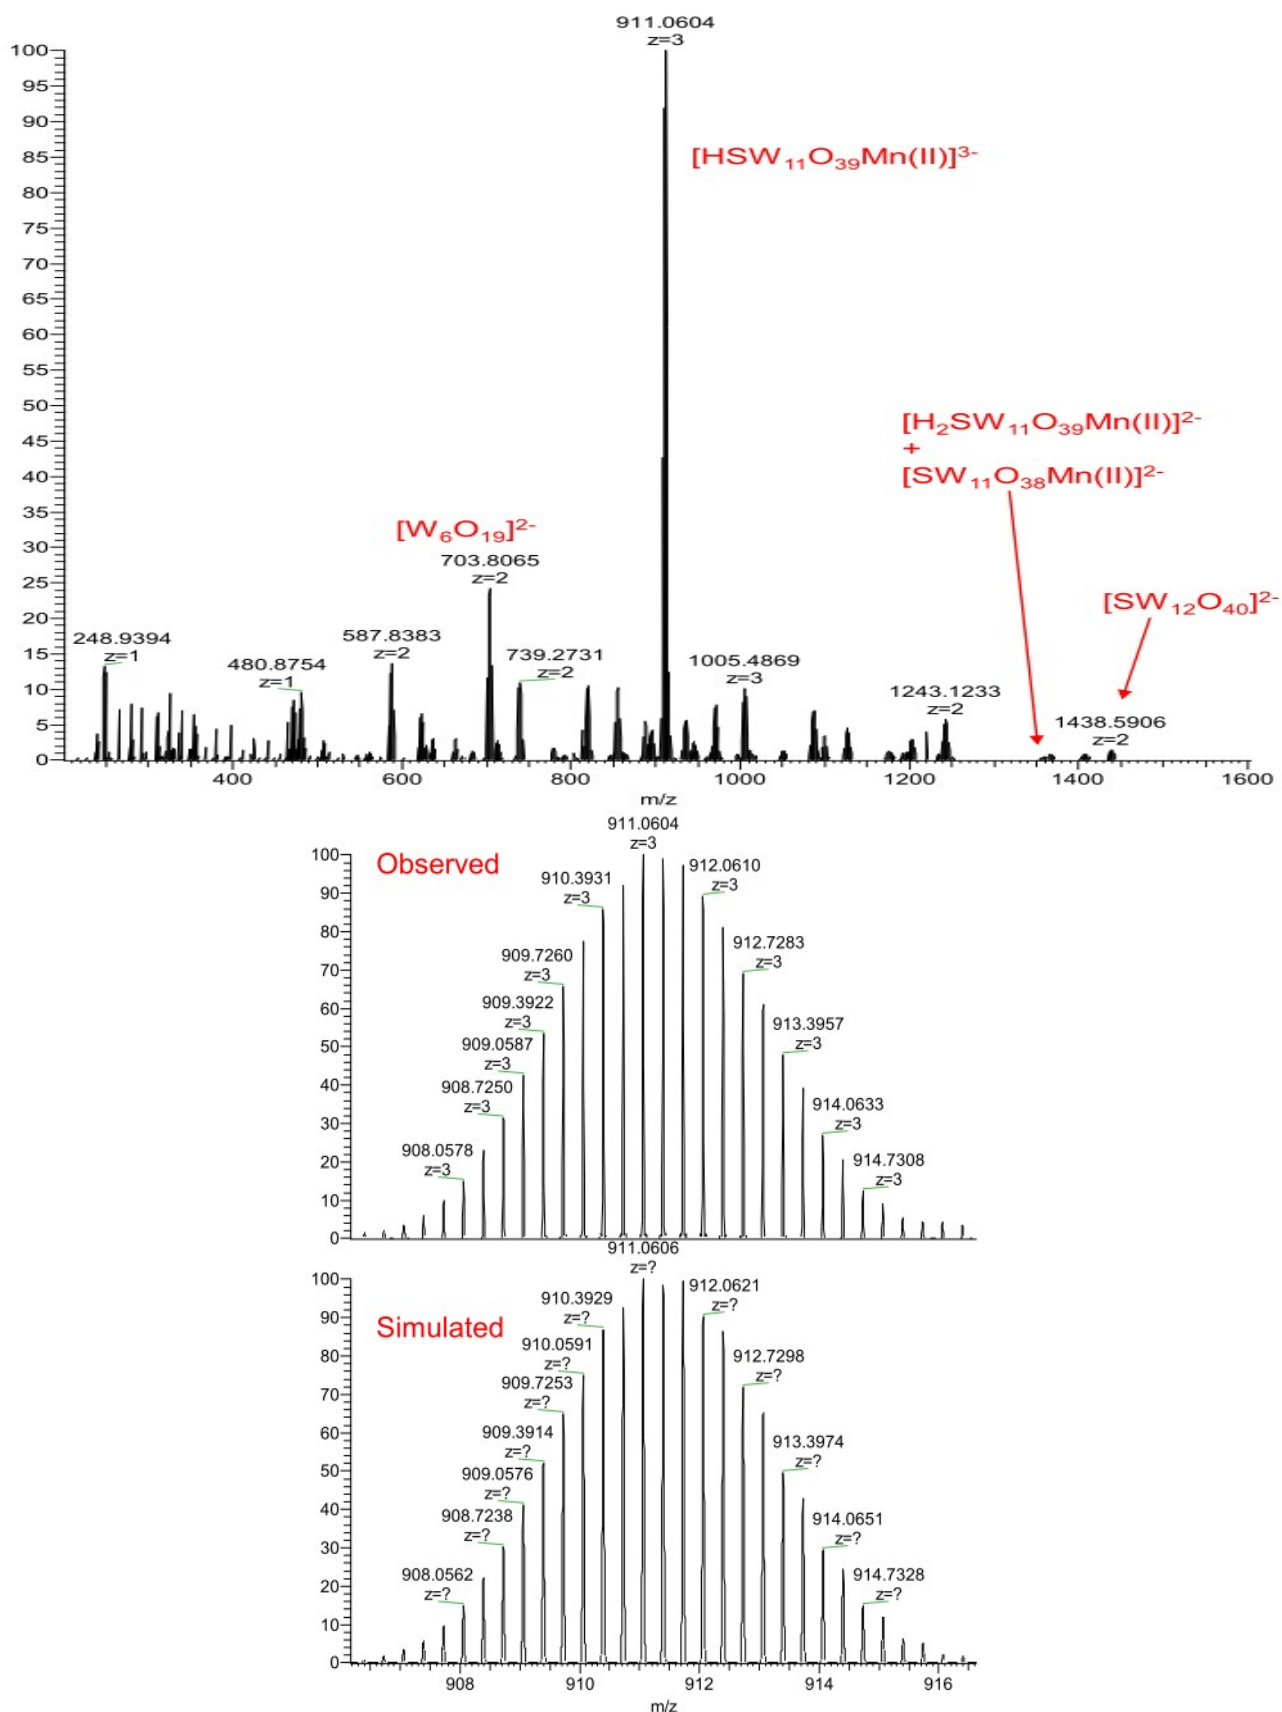

**Figure S2** ESI-MS spectra of  $(Bu_4N)_4[SMnW_{11}O_{39}]$  dissolved in  $CH_3CN$ . (top) Spectrum between  $m/z$  of 200 and 1600 and (bottom) expansion of the profile assignable to  $[HSMnW_{11}O_{39}]^{3-}$ .

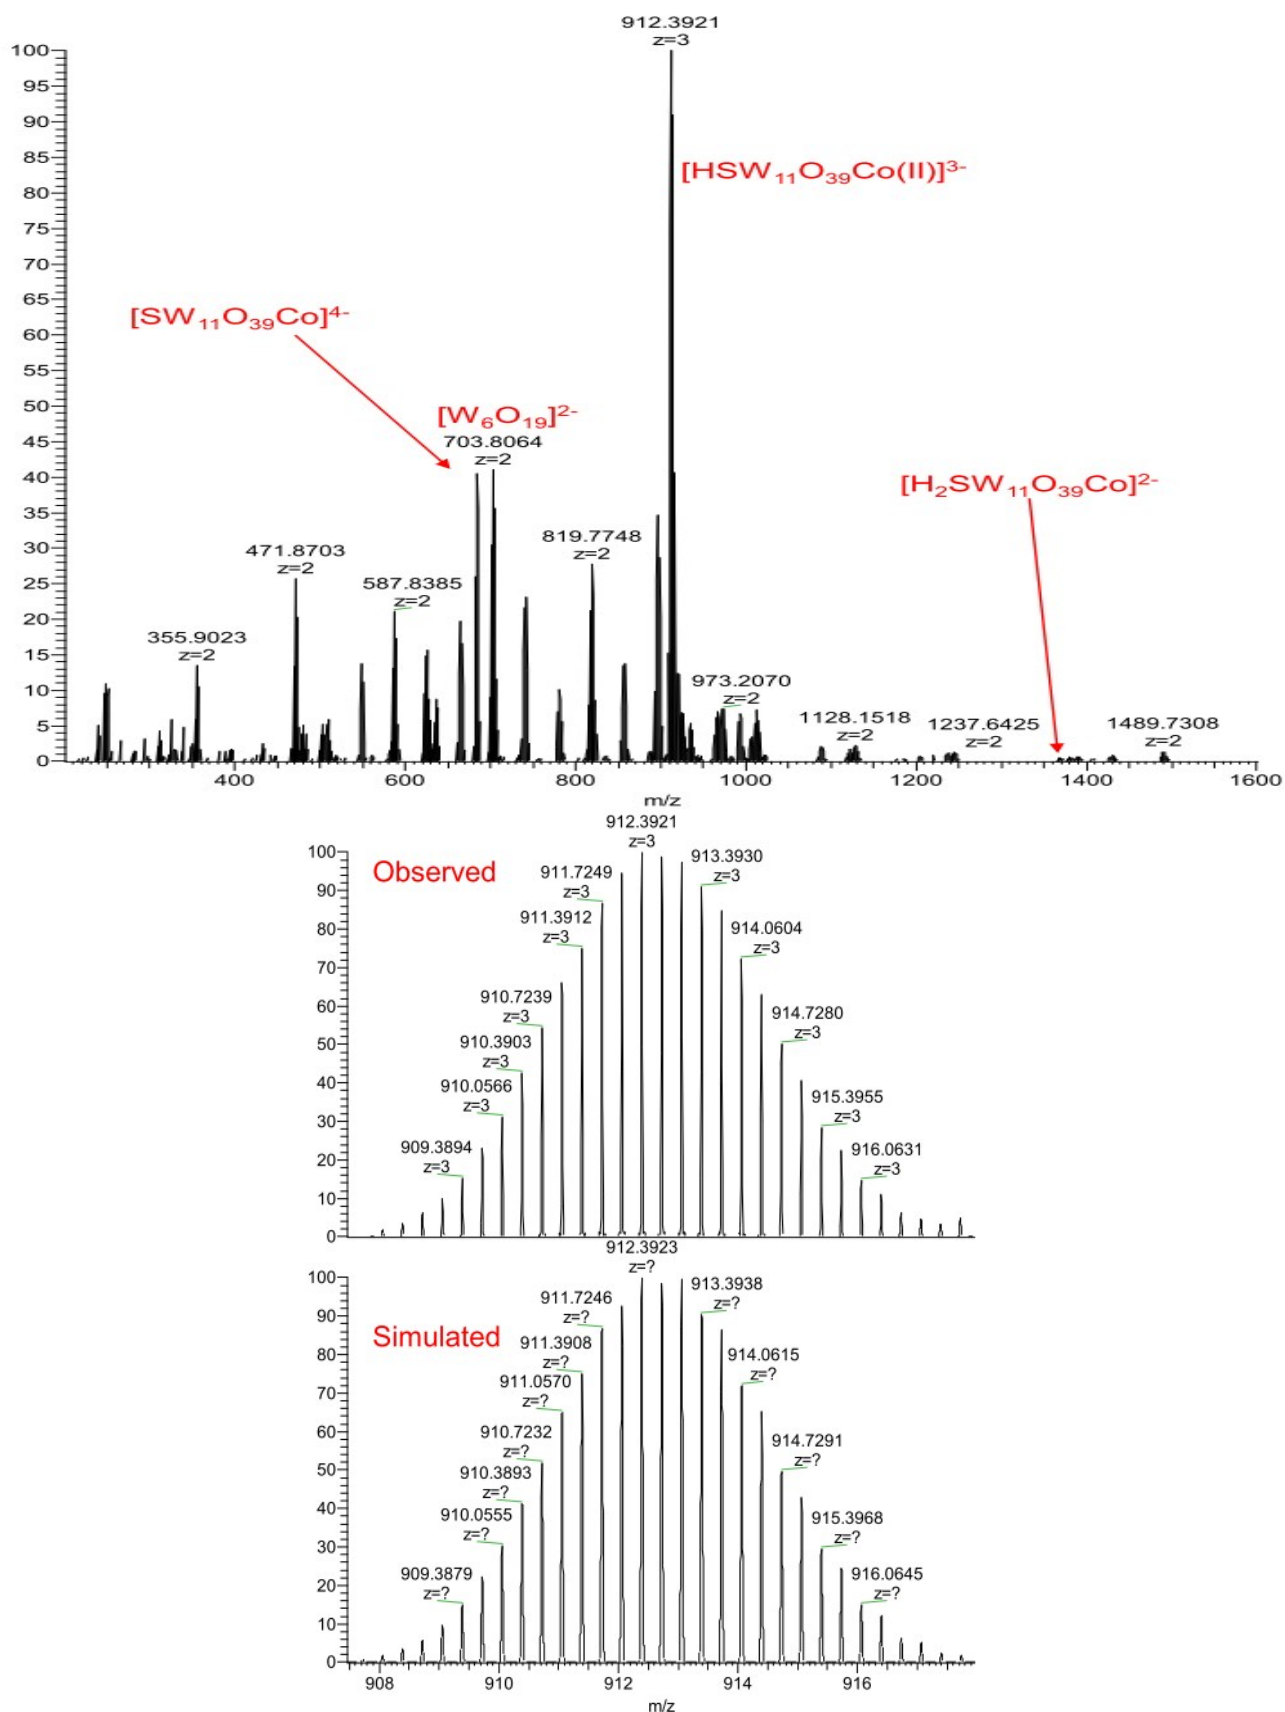

**Figure S3** ESI-MS spectra of  $(Bu_4N)_4[SCoW_{11}O_{39}]$  dissolved in  $CH_3CN$ . (top) Spectrum between  $m/z$  of 200 and 1600 and (bottom) expansion of the profile assignable to  $[HSCoW_{11}O_{39}]^{3-}$ .

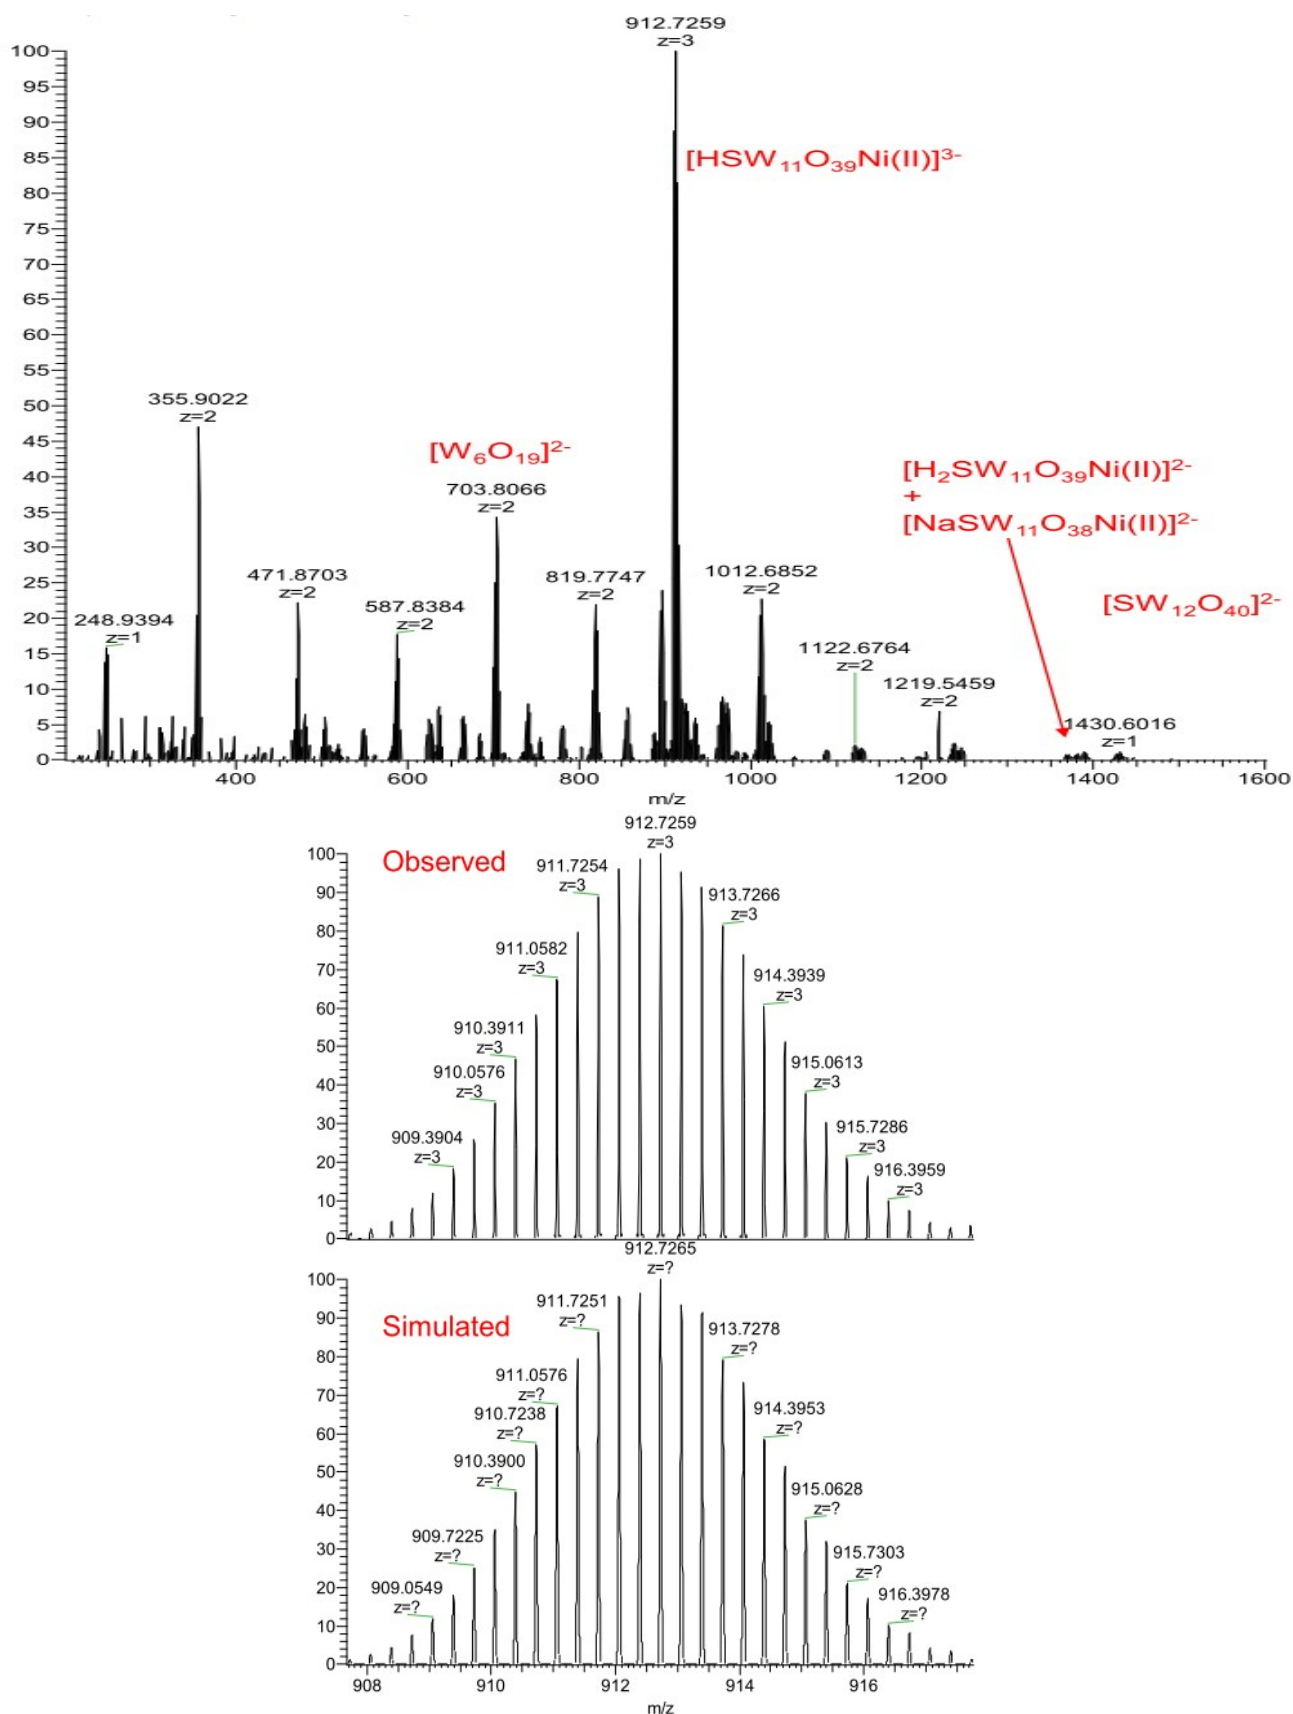

**Figure S4** ESI-MS spectra of  $(Bu_4N)_4[SNiW_{11}O_{39}]$  dissolved in  $CH_3CN$ . (top) Spectrum between  $m/z$  of 200 and 1600 and (bottom) expansion of the profile assignable to  $[HSNiW_{11}O_{39}]^{3-}$ .



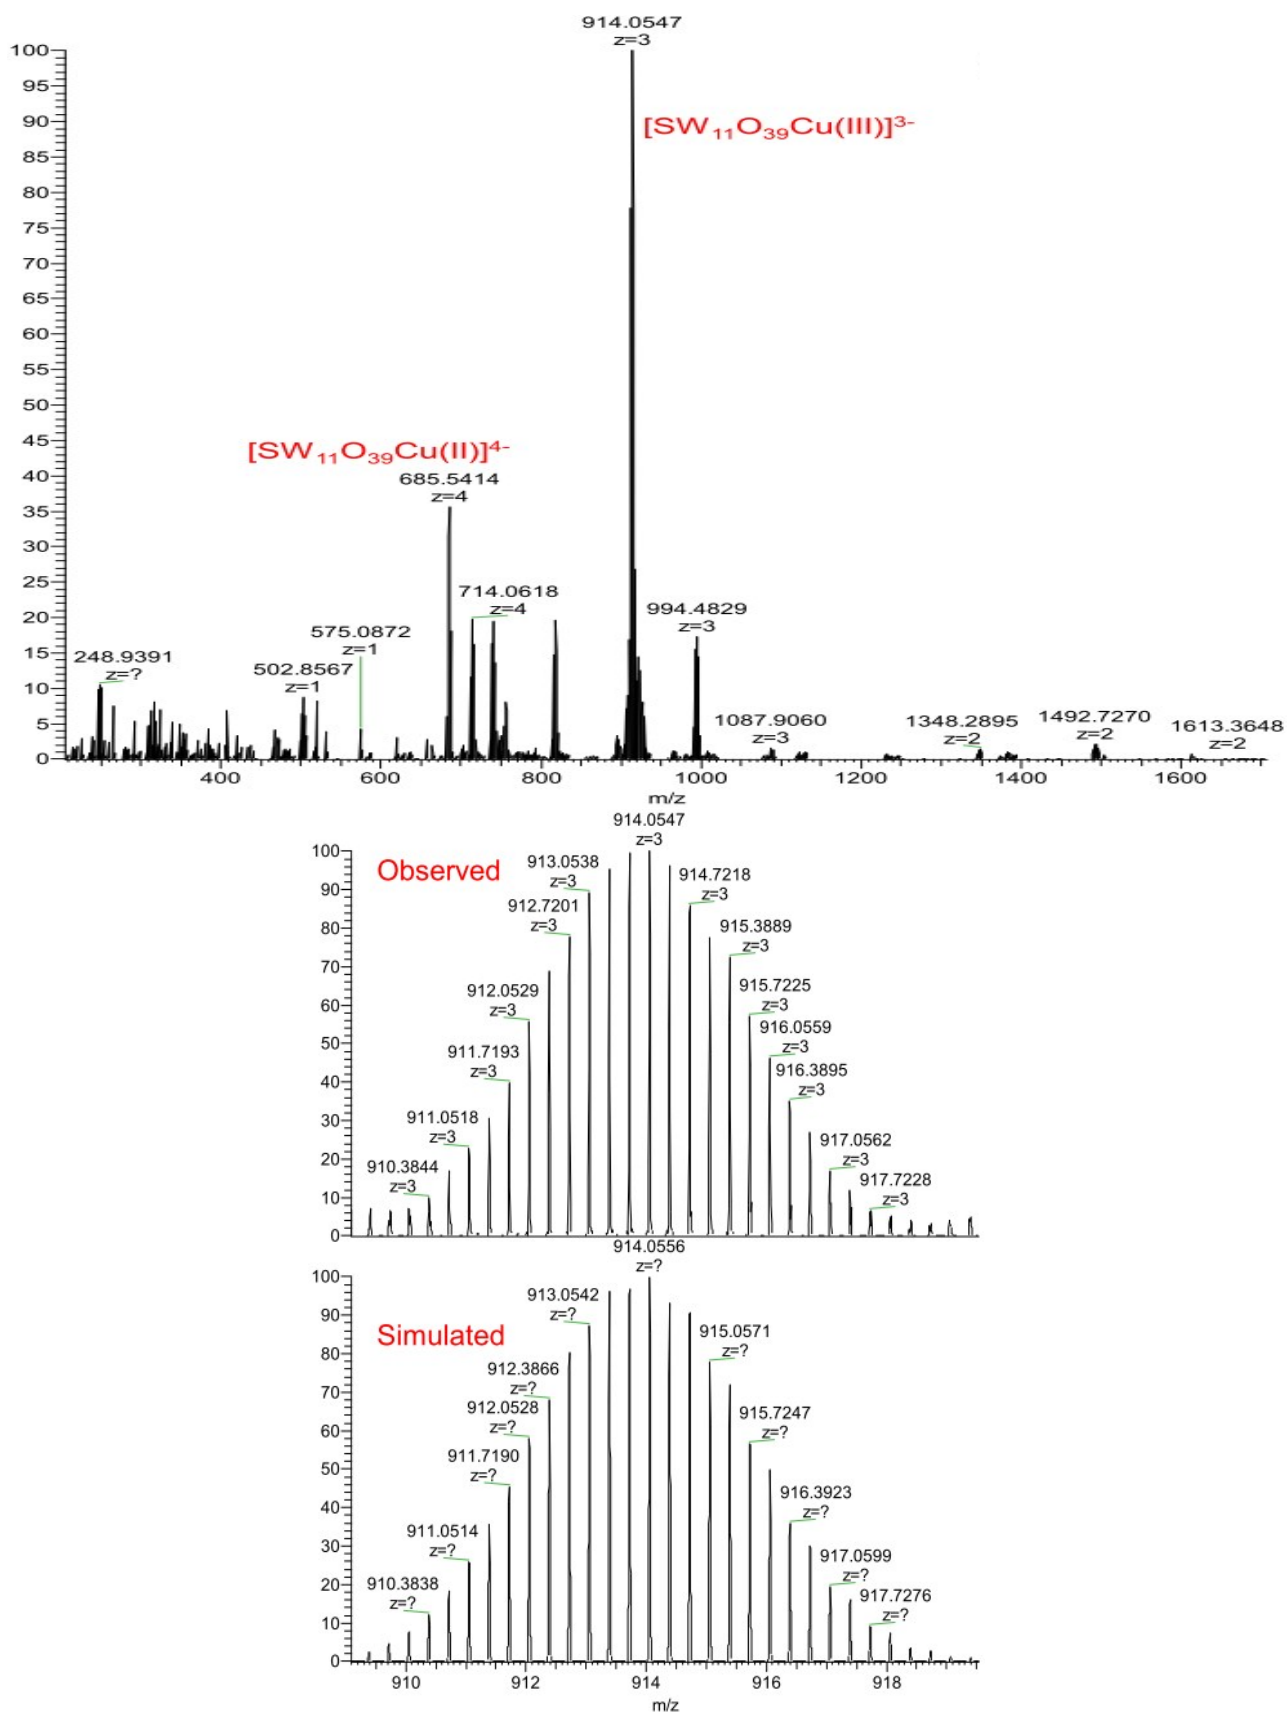

**Figure S5** ESI-MS spectra of  $(Bu_4N)_4[SCuW_{11}O_{39}]$  dissolved in  $CH_3CN$ . (top) Spectrum between  $m/z$  of 200 and 1600 and (bottom) expansion of the profile assignable to  $[SCuW_{11}O_{39}]^{3-}$ .

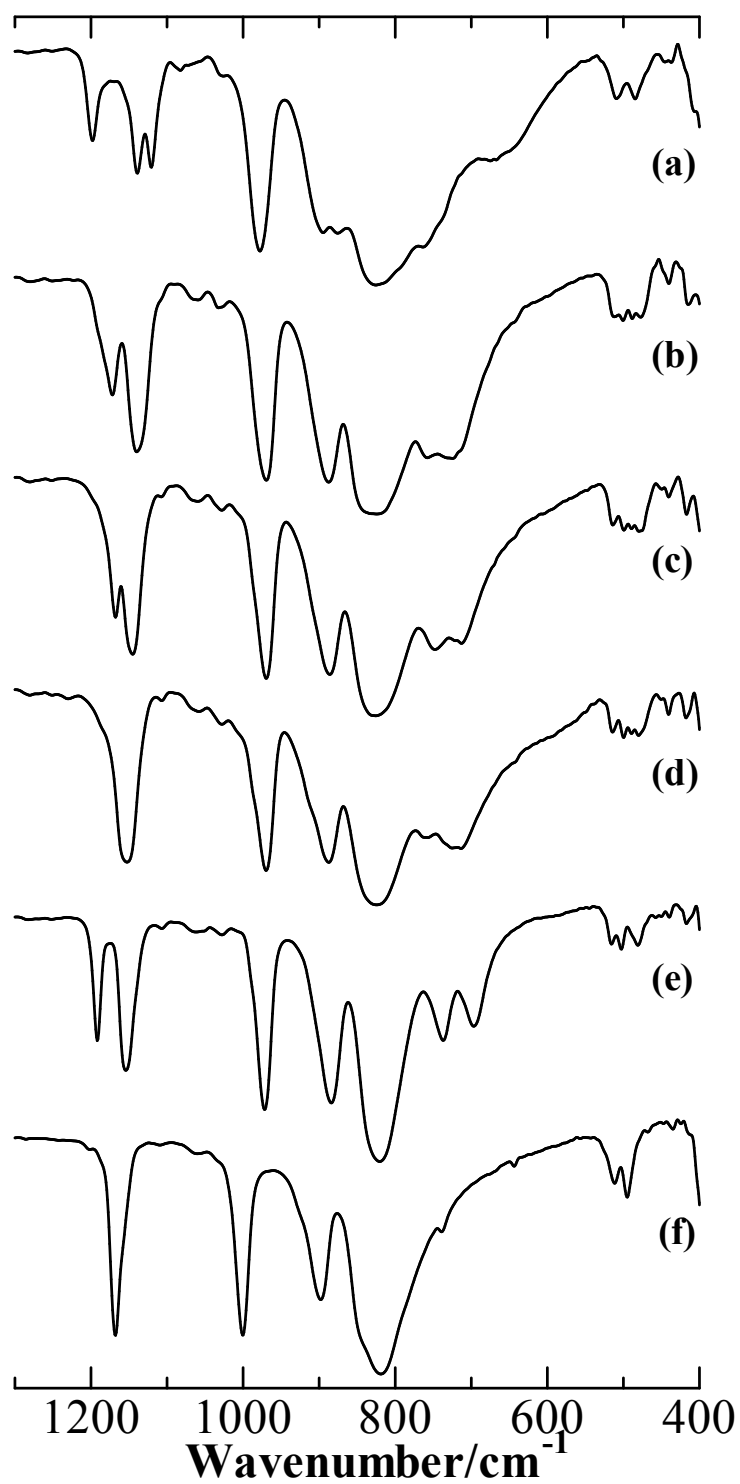

**Figure S6** IR spectra of the tetra-butyl ammonium salts of (a) [SW<sub>11</sub>O<sub>39</sub>]<sup>6-</sup>, (b) [SMnW<sub>11</sub>O<sub>39</sub>]<sup>4-</sup>, (c) [SCoW<sub>11</sub>O<sub>39</sub>]<sup>4-</sup>, (d) [SNiW<sub>11</sub>O<sub>39</sub>]<sup>4-</sup>, (e) [SCuW<sub>11</sub>O<sub>39</sub>]<sup>4-</sup> and (f) [SW<sub>12</sub>O<sub>40</sub>]<sup>2-</sup>.

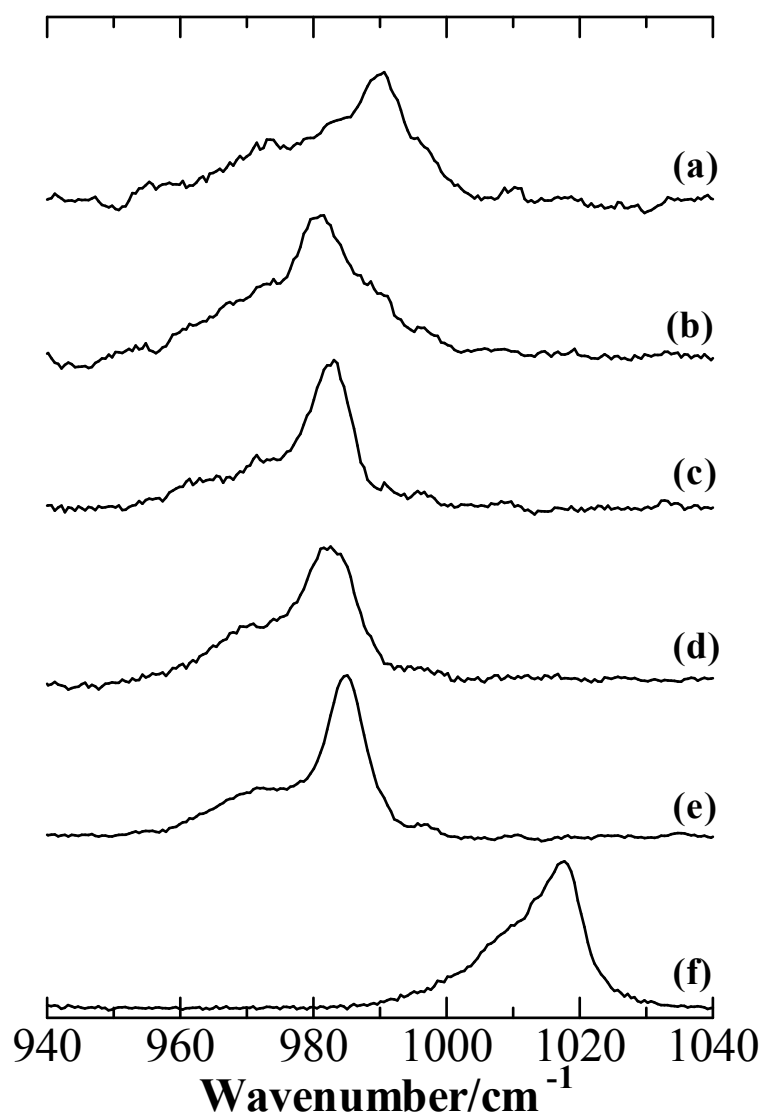

**Figure S7** Raman spectra of the tetra-butyl ammonium salts of (a)  $[\text{SW}_{11}\text{O}_{39}]^{6-}$ , (b)  $[\text{SMnW}_{11}\text{O}_{39}]^{4-}$ , (c)  $[\text{SCoW}_{11}\text{O}_{39}]^{4-}$ , (d)  $[\text{SNiW}_{11}\text{O}_{39}]^{4-}$ , (e)  $[\text{SCuW}_{11}\text{O}_{39}]^{4-}$  and (f)  $[\text{SW}_{12}\text{O}_{40}]^{2-}$ .

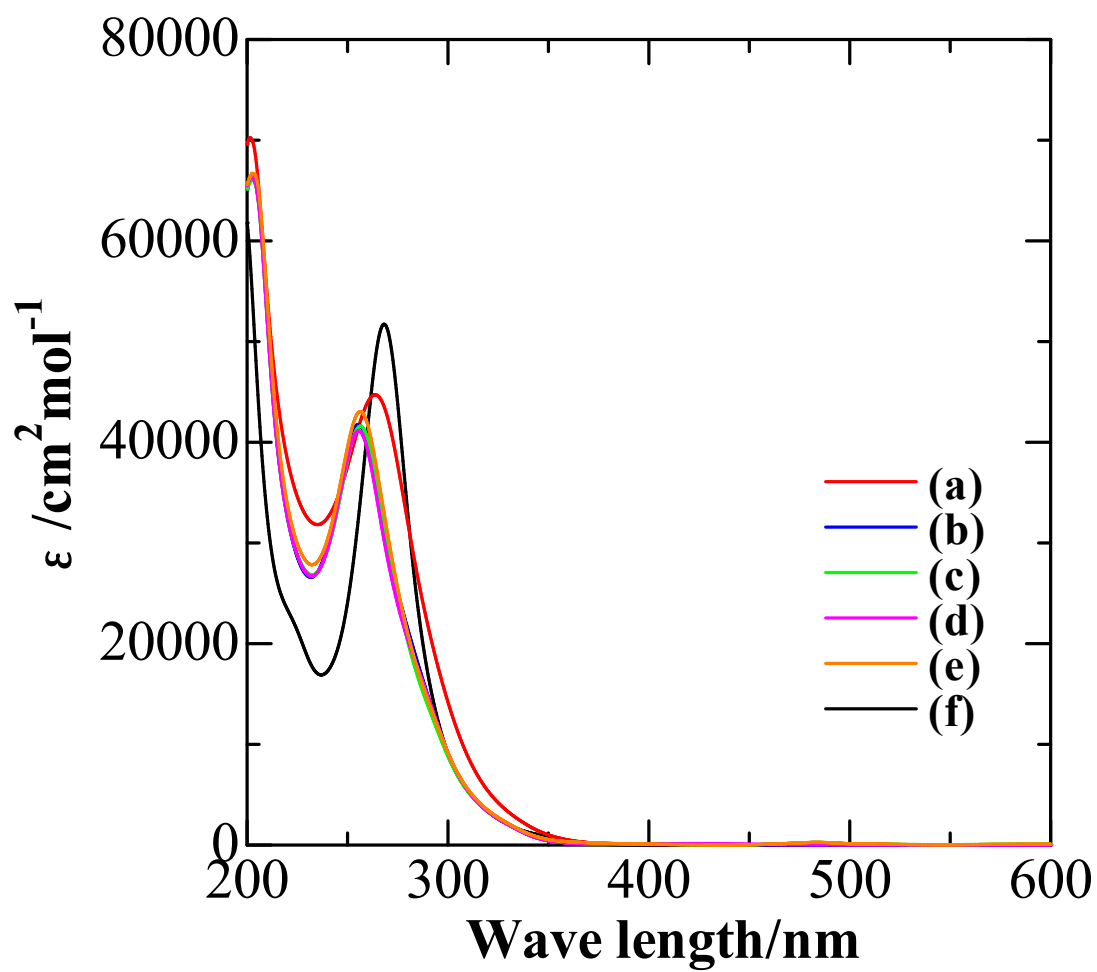

**Figure S8** UV-Vis spectra of (a)  $[\text{SW}_{11}\text{O}_{39}]^{6-}$ , (b)  $[\text{SMnW}_{11}\text{O}_{39}]^{4-}$ , (c)  $[\text{SCoW}_{11}\text{O}_{39}]^{4-}$ , (d)  $[\text{SNiW}_{11}\text{O}_{39}]^{4-}$ , and (e)  $[\text{SCuW}_{11}\text{O}_{39}]^{4-}$  in  $\text{CH}_3\text{CN}$  and (f)  $[\text{SW}_{12}\text{O}_{40}]^{2-}$  in acetone. **Fi**
